# Supplementary material
Source: publisher site journal article supplement (https://e-cmh.org/upload/media/cmh-2023-0087-Supplementary-Table-2.pdf)
Supplement: Supplementary file 1 [file cmh-2023-0087-Supplementary-Table-2.pdf]

**Supplementary Table 2.** Development timeline of KASL Clinical Practice Guidelines for Management of Autoimmune Hepatitis (2022)

|                           |                                                                                                                                                                           |
|---------------------------|---------------------------------------------------------------------------------------------------------------------------------------------------------------------------|
| <b>February 8, 2022</b>   | KASL Board of Executives: Appointed the chair of the Development Committee of the KASL Clinical Practice Guidelines for Management of AIH (Kyung-Ah Kim, Inje University) |
| <b>March 8, 2022</b>      | Appointed and approved the members of the development committee of the KASL Clinical Practice Guidelines for Management of AIH                                            |
| <b>March 14, 2022</b>     | Development Committee, 1st meeting                                                                                                                                        |
| <b>April 4, 2022</b>      | Systematic Review Subcommittee of the Development Committee, 1st meeting: Reviewed the feasibility of major topics                                                        |
| <b>April 4, 2022</b>      | Development Committee, 2nd meeting: Developed key questions and searched supporting evidence                                                                              |
| <b>May 10, 2022</b>       | Systematic Review Subcommittee of the Development Committee, 2nd meeting: Selected the topic and reviewed the literature                                                  |
| <b>May 21, 2022</b>       | Development Committee, 3rd meeting: Prepared the first draft                                                                                                              |
| <b>May 30, 2022</b>       | Systematic Review Subcommittee of the Development Committee, 3rd meeting: Selected the topic and reviewed the literature                                                  |
| <b>June 10, 2022</b>      | Development Committee, 4th meeting: Reviewed the revised draft                                                                                                            |
| <b>June 13, 2022</b>      | Systematic Review Subcommittee of the Development Committee, 4th meeting: Discussed outcome variables                                                                     |
| <b>July 6, 2022</b>       | Systematic Review Subcommittee of the Development Committee, 5th meeting: Reviewed the process of assessing the quality of evidence (risk of bias)                        |
| <b>July 12, 2022</b>      | Development Committee, 5th meeting: Assessed the quality of evidence and developed recommendations                                                                        |
| <b>July 28, 2022</b>      | Systematic Review Subcommittee of the Development Committee, 6th meeting: Assessed the quality of evidence (risk of bias)                                                 |
| <b>August 5, 2022</b>     | Development Committee, 6th meeting: Revised recommendations                                                                                                               |
| <b>August 12, 2022</b>    | 1st round of the Delphi survey on recommendations                                                                                                                         |
| <b>August 16, 2022</b>    | Systematic Review Subcommittee of the Development Committee, 7th meeting: Synthesis of evidence and develop recommendations based on the systematic review                |
| <b>August 16, 2022</b>    | Development Committee, 7th meeting: Reviewed the results of the Delphi survey and revised recommendations                                                                 |
| <b>September 8, 2022</b>  | 2nd round of the Delphi survey on revised recommendations                                                                                                                 |
| <b>September 23, 2022</b> | Development Committee, 8th meeting: Reviewed the results of the Delphi survey and revised recommendations                                                                 |
| <b>October 6, 2022</b>    | Advisory Committee meeting                                                                                                                                                |
| <b>October 27, 2022</b>   | Public meeting (online) on the KASL Clinical Practice Guidelines for Management of AIH                                                                                    |
| <b>October 29, 2022</b>   | 3rd round of the Delphi survey on final recommendations                                                                                                                   |
| <b>November 8, 2022</b>   | KASL Board of Executives: Approved the final draft                                                                                                                        |
| <b>December 1, 2022</b>   | Presented the Korean version of the KASL Clinical Practice Guidelines for Management of AIH at KDDW 2022 (Grand Hyatt, Incheon)                                           |
